# Supplementary material for: Sourdough starter-inspired living materials grown from probiotic consortia with engineered division-of-labor
Source: Research Square preprint supplement (doi:10.21203/rs.3.rs-8285095/v1), 2025-12-19
Supplement: Supplementary file 1 [file 4f8b842ed124a4ba7271f39a.pdf]

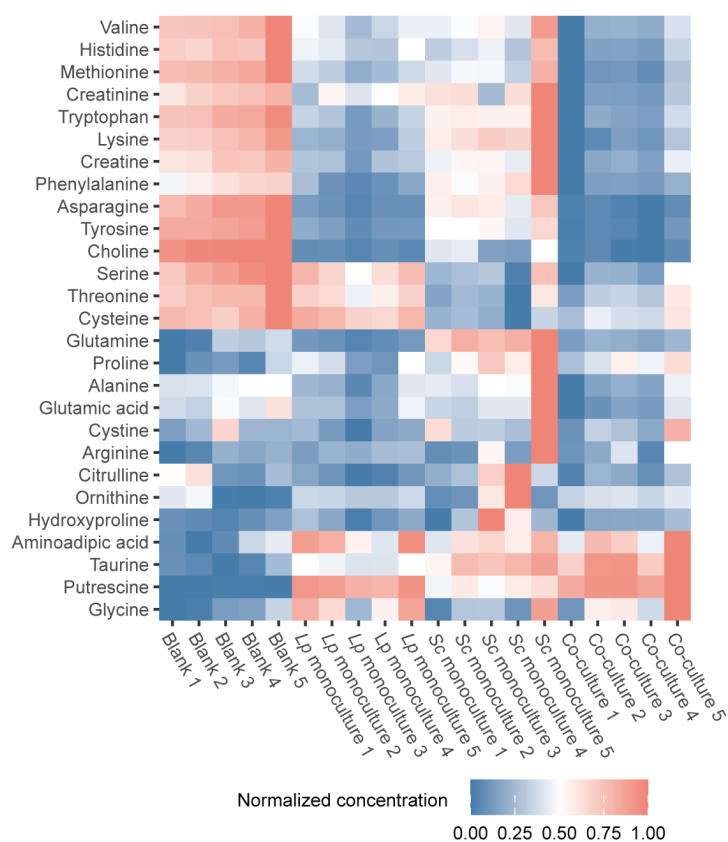

### Supplementary Fig. 1: Metabolomic analysis of synthetic sourdough starter.

Targeted metabolomics of amino acids in synthetic starter from blank medium, *L. plantarum* mono-culture, *S. cerevisiae* mono-culture, and co-culture (mean  $\pm$  sd, n = 5 starters).

**a**

## Minimized GPCR signalling pathway

|           | Spacer 1: reporter      |       |                   | Spacer 2: Gα (Gpa1 chimera) |           |                   | Spacer 3: Receptor |                     |                   | Spacer 4: TF       |          |                   |
|-----------|-------------------------|-------|-------------------|-----------------------------|-----------|-------------------|--------------------|---------------------|-------------------|--------------------|----------|-------------------|
| Design 1  | P <sub>FUS1</sub>       | sfGFP | T <sub>TDH1</sub> | P <sub>PGK1</sub>           | Gpa1-Gai3 | T <sub>ENO2</sub> | P <sub>TDH3</sub>  | P2Y2 (human)        | T <sub>SSA1</sub> | P <sub>RAD27</sub> | STE12    | T <sub>ENO1</sub> |
| Design 2  | LexO-P <sub>LEU2m</sub> | sfGFP | T <sub>TDH1</sub> | P <sub>PGK1</sub>           | Gpa1-Gai3 | T <sub>ENO2</sub> | P <sub>TDH3</sub>  | P2Y2 (human)        | T <sub>SSA1</sub> | P <sub>RAD27</sub> | LexA-PRD | T <sub>ENO1</sub> |
| Design 3  | LexO-P <sub>LEU2m</sub> | sfGFP | T <sub>TDH1</sub> | P <sub>ALD6</sub>           | Gpa1-Gai3 | T <sub>ENO2</sub> | P <sub>TDH3</sub>  | P2Y2 (human)        | T <sub>SSA1</sub> | P <sub>RAD27</sub> | LexA-PRD | T <sub>ENO1</sub> |
| Design 4  | LexO-P <sub>LEU2m</sub> | sfGFP | T <sub>TDH1</sub> | P <sub>ALD6</sub>           | Gpa1-Gai3 | T <sub>ENO2</sub> | P <sub>TDH3</sub>  | P2Y2 (mouse)        | T <sub>SSA1</sub> | P <sub>RAD27</sub> | LexA-PRD | T <sub>ENO1</sub> |
| Design 5  | LexO-P <sub>LEU2m</sub> | sfGFP | T <sub>TDH1</sub> | P <sub>ALD6</sub>           | Gpa1-Gai3 | T <sub>ENO2</sub> | P <sub>TDH3</sub>  | P2Y2 (olive baboon) | T <sub>SSA1</sub> | P <sub>RAD27</sub> | LexA-PRD | T <sub>ENO1</sub> |
| Design 6  | LexO-P <sub>LEU2m</sub> | sfGFP | T <sub>TDH1</sub> | P <sub>ALD6</sub>           | Gpa1-Gai3 | T <sub>ENO2</sub> | P <sub>TDH3</sub>  | P2Y2 (green monkey) | T <sub>SSA1</sub> | P <sub>RAD27</sub> | LexA-PRD | T <sub>ENO1</sub> |
| Design 7  | LexO-P <sub>LEU2m</sub> | sfGFP | T <sub>TDH1</sub> | P <sub>ALD6</sub>           | Gpa1-Gai3 | T <sub>ENO2</sub> | P <sub>TDH3</sub>  | P2Y2 (cat)          | T <sub>SSA1</sub> | P <sub>RAD27</sub> | LexA-PRD | T <sub>ENO1</sub> |
| Design 8  | LexO-P <sub>LEU2m</sub> | sfGFP | T <sub>TDH1</sub> | P <sub>ALD6</sub>           | Gpa1-Gai3 | T <sub>ENO2</sub> | P <sub>TDH3</sub>  | P2Y2 (cat, Q165H)   | T <sub>SSA1</sub> | P <sub>RAD27</sub> | LexA-PRD | T <sub>ENO1</sub> |
| Design 9  | LexO-P <sub>LEU2m</sub> | sfGFP | T <sub>TDH1</sub> | P <sub>ALD6</sub>           | Gpa1-Gai3 | T <sub>ENO2</sub> | P <sub>TDH3</sub>  | P2Y2 (cat, N116S)   | T <sub>SSA1</sub> | P <sub>RAD27</sub> | LexA-PRD | T <sub>ENO1</sub> |
| Design 10 | LexO-P <sub>LEU2m</sub> | sfGFP | T <sub>TDH1</sub> | P <sub>ALD6</sub>           | Gpa1-Gai3 | T <sub>ENO2</sub> | P <sub>TDH3</sub>  | P2Y2 (cat, F58I)    | T <sub>SSA1</sub> | P <sub>RAD27</sub> | LexA-PRD | T <sub>ENO1</sub> |

**b**

| Name      | Description                   | Sensitivity                                                               | Max output                  | Operational range                                                                                              | Dynamic range                 | Tightness            |
|-----------|-------------------------------|---------------------------------------------------------------------------|-----------------------------|----------------------------------------------------------------------------------------------------------------|-------------------------------|----------------------|
|           |                               | 1/(lowest log concentration for which a >2-fold change in GFP expression) | Maximum fluorescence output | Concentration between the sensitivity and the lowest concentration that gives a GFP output half of the maximum | Maximum output/basal activity | 1/basal fluorescence |
| Design 1  | Initial design                | NA                                                                        | 375.00                      | NA                                                                                                             | NA                            | NA                   |
| Design 2  | LexA-PRD transcription factor | NA                                                                        | 468.56                      | NA                                                                                                             | NA                            | NA                   |
| Design 3  | creased Gpa1 chimera express  | NA                                                                        | 1918.18                     | NA                                                                                                             | 2.16                          | 1.13E-03             |
| Design 4  | P2Y2 from mouse               | NA                                                                        | 1542.68                     | NA                                                                                                             | 2.05                          | 1.33E-03             |
| Design 5  | P2Y2 from olive baboon        | 0.23                                                                      | 12260.93                    | 0.92                                                                                                           | 18.25                         | 1.49E-03             |
| Design 6  | P2Y2 from green monkey        | 0.19                                                                      | 3569.00                     | NA                                                                                                             | 3.15                          | 8.81E-03             |
| Design 7  | P2Y2 from cat                 | 0.25                                                                      | 20840.35                    | 0.98                                                                                                           | 26.83                         | 1.29E-03             |
| Design 8  | P2Y2 from cat, Q165H          | 0.39                                                                      | 17833.95                    | 0.91                                                                                                           | 6.91                          | 3.88E-03             |
| Design 9  | P2Y2 from cat, N116S          | 0.17                                                                      | 20176.53                    | NA                                                                                                             | 1.35                          | 6.71E-03             |
| Design 10 | P2Y2 from cat, F58I           | 0.33                                                                      | 28216.04                    | 1.38                                                                                                           | 32.96                         | 1.17E-03             |

**Supplementary Fig. 2: Modular circuit layouts and dose-response characteristics of yeast eATP sensor strains.**

(a) A list of parts and layouts of multigene cassettes for each eATP sensor strain design. The cassettes are integrated at the *URA3* loci. (TF: transcription factor). (b) Dose-response characteristics for the yeast eATP sensor strains.

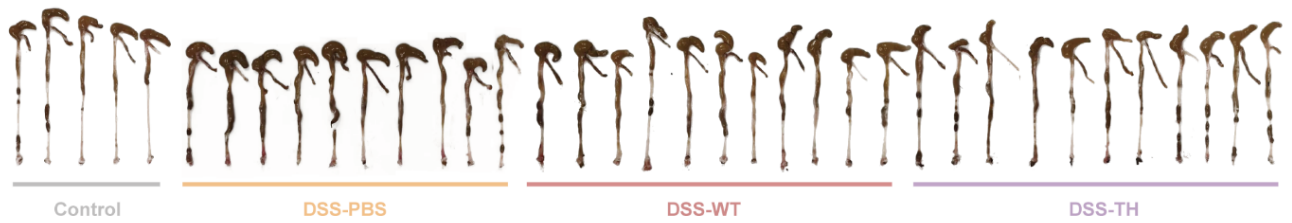

**Supplementary Fig. 3: Colon images of mice with indicated treatments on day 12.** Control: healthy control group (n=5 mice); DSS-PBS: DSS-induced mice administered PBS (n=10 mice); DSS-WT: DSS-induced mice administered synthetic starter with wild-type yeast and *L. plantarum* (n=11 mice); DSS-TH: DSS-induced mice administered therapeutic SINERGY (n=11 mice).
