# Supplementary material for: Sourdough starter-inspired living materials grown from probiotic consortia with engineered division-of-labor
Source: Research Square preprint supplement (doi:10.21203/rs.3.rs-8285095/v1), 2025-12-19
Supplement: Supplementary file 2 [file 576f890d3fb61ebf483fdb02.pdf]

## Extended data figures

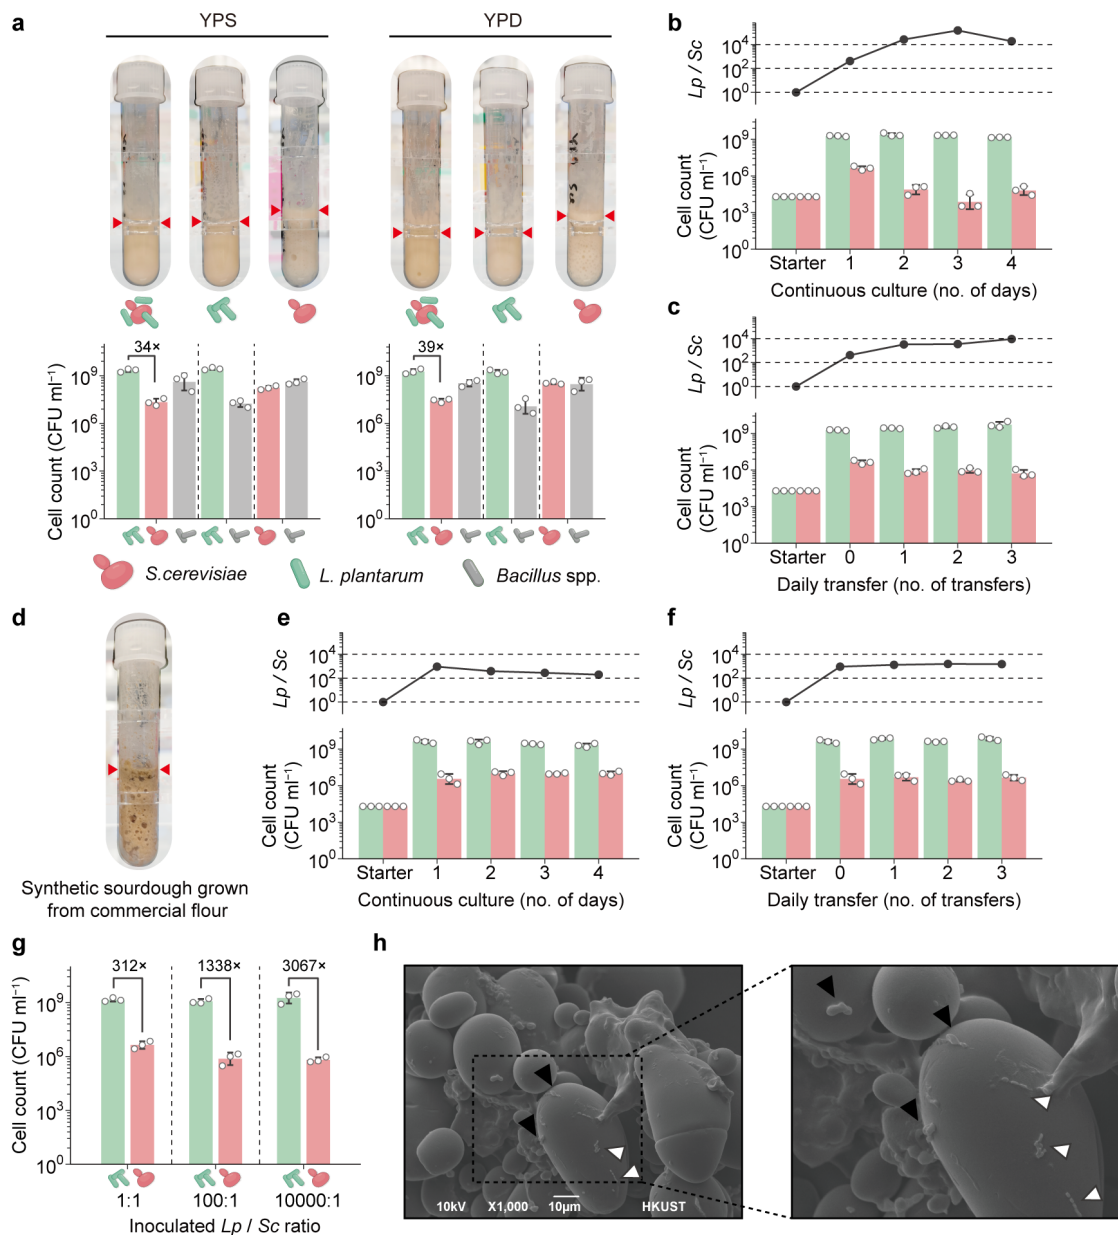

**Extended Data Fig. 1: Inoculation conditions to determine the texture and composition of synthetic starter.**

(a) Cell counts and images of synthetic starter grown from YPD and YPS (mean  $\pm$  sd,  $n = 3$  starters). The red triangular arrows indicate the fermentation height of the synthetic starter. Grey bars indicate uninoculated *Bacillus* spp. in the starter, likely originating from the gluten product. (b and c) Cell counts and ratio of *L. plantarum* NC8 to *S. cerevisiae* ( $Lp / Sc$ ) over days of continuous culture (b) and daily transfer (c) (cell count represented by mean  $\pm$  sd, ratio represented by mean value,  $n = 3$  starters). (d) Image of synthetic sourdough starter grown from commercial flour. (e and f) Cell counts and  $Lp / Sc$  ratio over days of continuous culture (e) and daily transfer (f) with commercial flour (cell counts represented by mean  $\pm$  sd, ratio represented by mean value,  $n = 3$  starters). (g) Cell counts of the synthetic starter grown

from different inoculation ratios (cell counts represented by mean  $\pm$  sd, n = 3 starters). (h)  
Representative SEM imaging of the synthetic starter. Black arrow: *S. cerevisiae* cells; white  
arrow: *L. plantarum*.

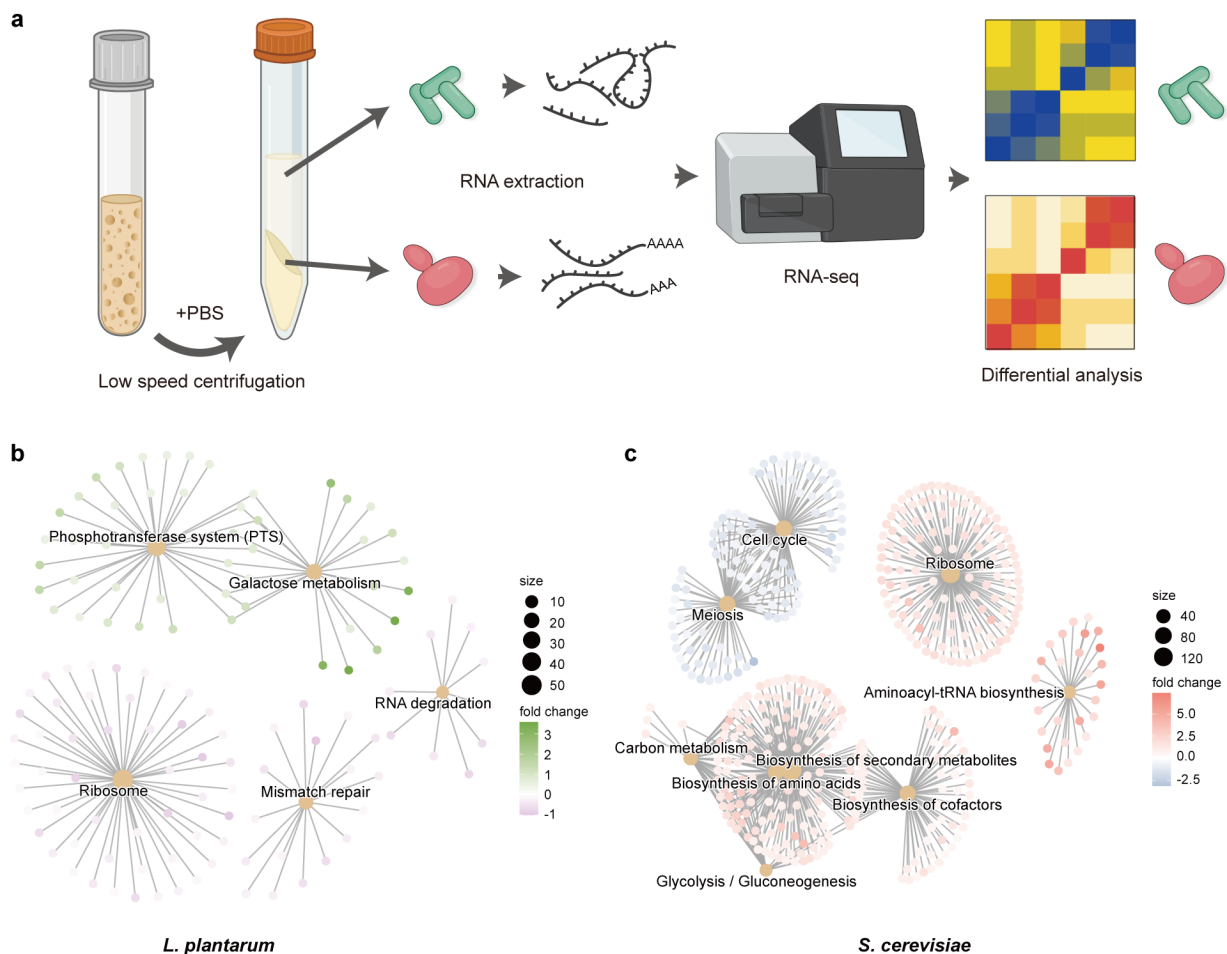

**Extended Data Fig. 2: Transcriptomic analysis to reveal molecular interactions between *L. plantarum* and *S. cerevisiae* in synthetic starter.**

(a) Schematic of transcriptomic analysis workflow. (b and c) Gene set enrichment assay of RNA-seq results for *L. plantarum* (b) and *S. cerevisiae* (c) under co-culture conditions compared with mono-culture conditions.

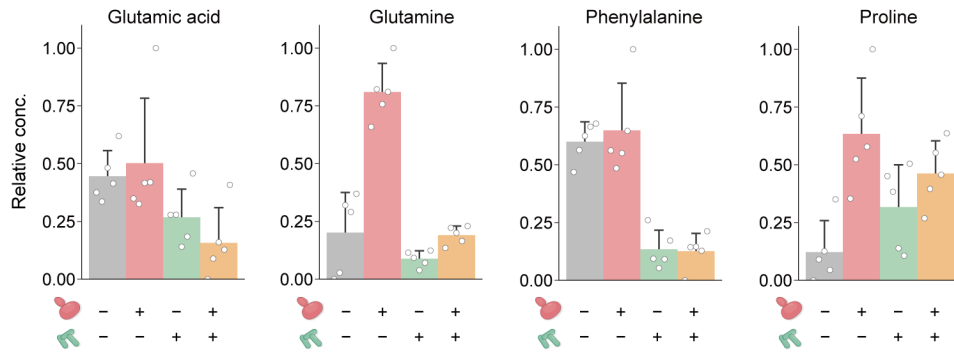

**Extended Data Fig. 3: Metabolomic analysis of synthetic sourdough starter.**

Analysis of the relative concentration of glutamic acid, glutamine, phenylalanine and proline in synthetic starter from blank medium, *L. plantarum* mono-culture, *S. cerevisiae* mono-culture, and co-culture (mean  $\pm$  sd, n = 5 starters).

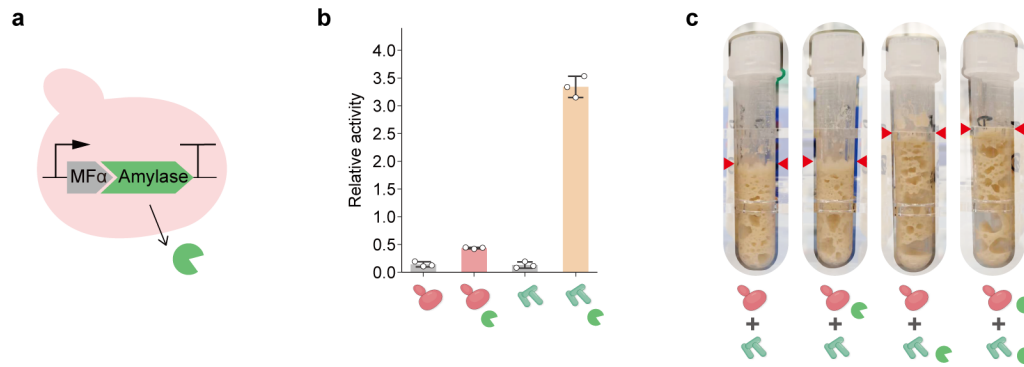

**Extended Data Fig. 4: Characterizing amylase-secreting *S. cerevisiae*.**

(a) Schematic of the engineered amylase-secreting *S. cerevisiae* strain. (b) Characterization of amylase-secreting capacity of the *S. cerevisiae* strain and comparison with *S. cerevisiae* wild-type strain, *L. plantarum* wild-type, and the yIF201 amylase-secreting *L. plantarum* strains (mean  $\pm$  sd, n = 3 independent cultures). (c) Representative images from the combinatorial co-culturing of *L. plantarum* and *S. cerevisiae* wild-type or amylase-secreting strain.

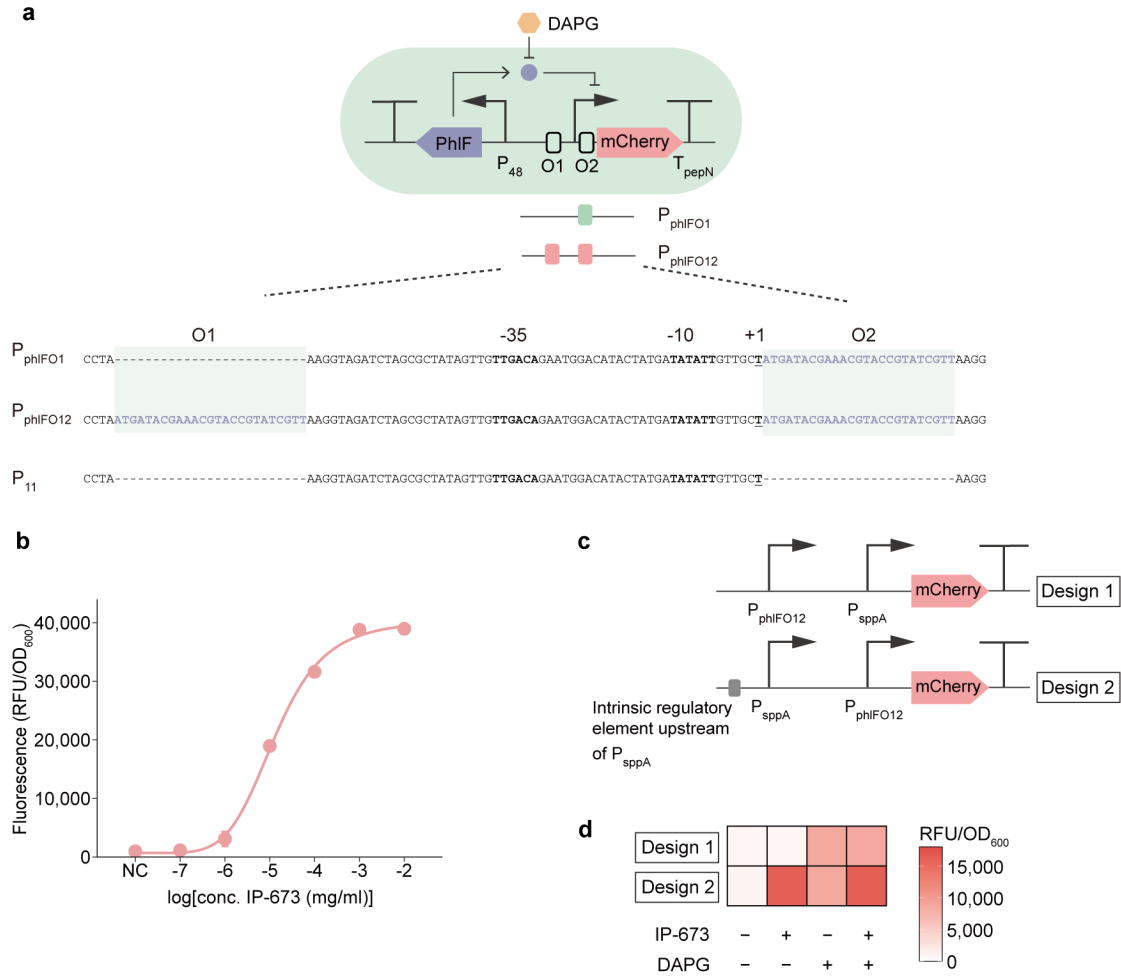

**Extended Data Fig. 5: Design and characterization of DAPG/IP-673 OR-gate in *L. plantarum*.**

(a) Design of PhIF-binding promoters. PhIF operator sites were inserted in various regions (O1 or O2) of the  $P_{11}$  promoter. (b) Dose-response properties of IP-673 peptide-inducible system in *L. plantarum* (mean  $\pm$  sd,  $n = 3$  independent cultures). (c) Design of DAPG/IP-673 OR-gate *L. plantarum* strains. (d) Characterization of the OR-gate in MRS broth with fluorescence output (mean,  $n = 3$  independent cultures).

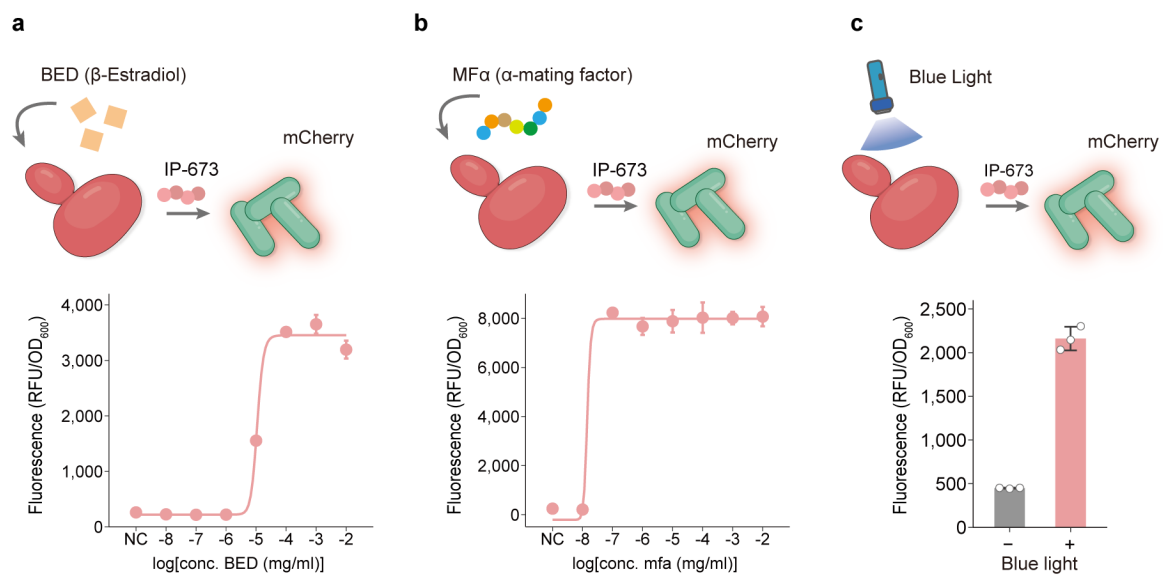

**Extended Data Fig. 6: Characterization of the communication system with mCherry fluorescence as reporter.**

**(a-c)** The responses of engineered consortia to various signals – **(a)** BED, **(b)** MF $\alpha$  **(c)** Blue light (mean  $\pm$  sd,  $n = 3$  independent cultures). NC, negative control.

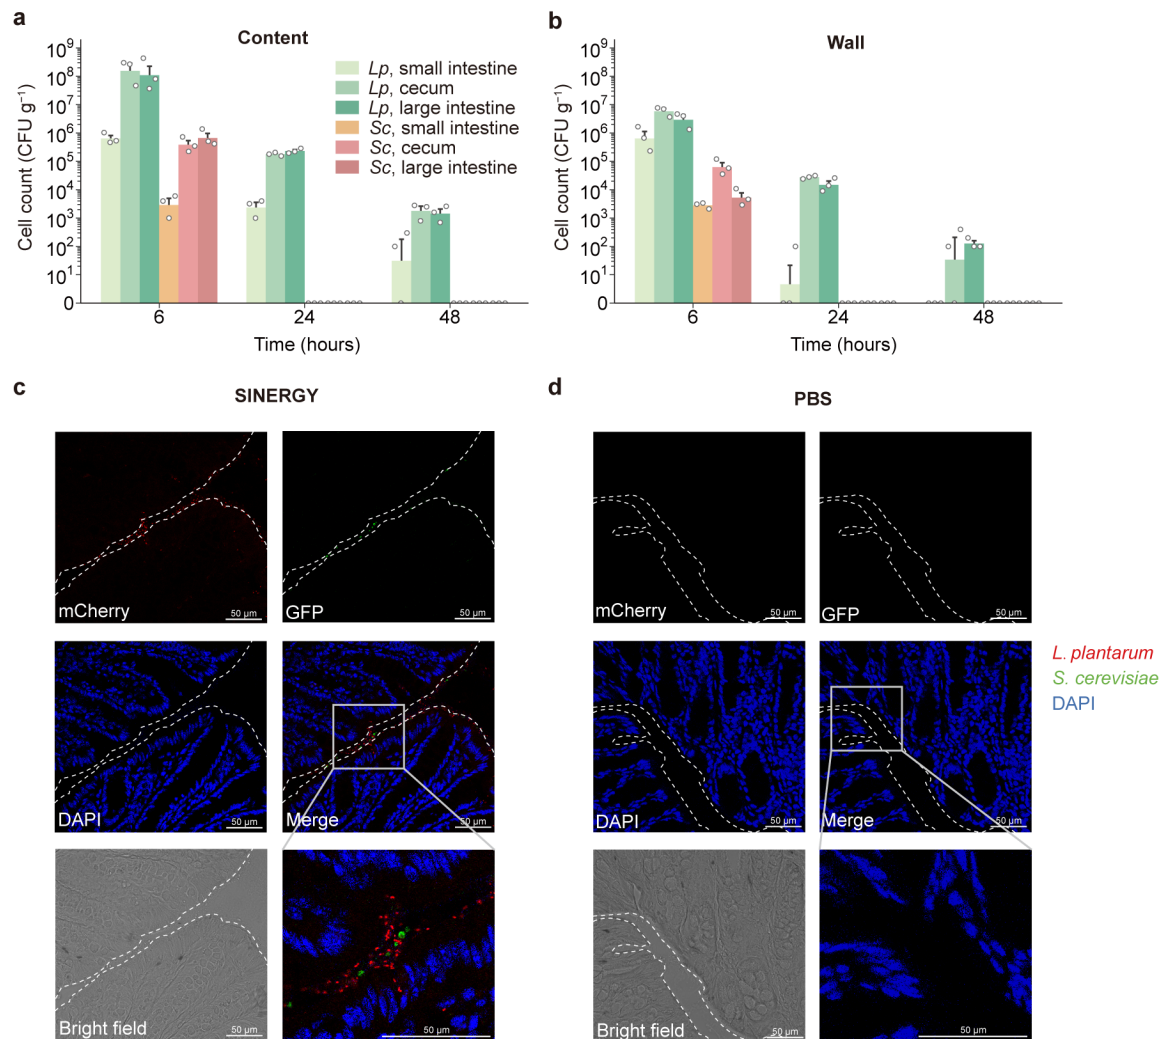

**Extended Data Fig. 7: Viability of *L. plantarum* and *S. cerevisiae* delivered by SINERGY in the murine gut.**

(**a** and **b**) Microbial cell counts in gut contents (**a**) and on walls (**b**) (mean  $\pm$  SEM, n = 3 mice). (**c** and **d**) Additional confocal visualization of fluorescent microorganisms in the colon of mice administered with SINERGY (**c**) compared with PBS (**d**).

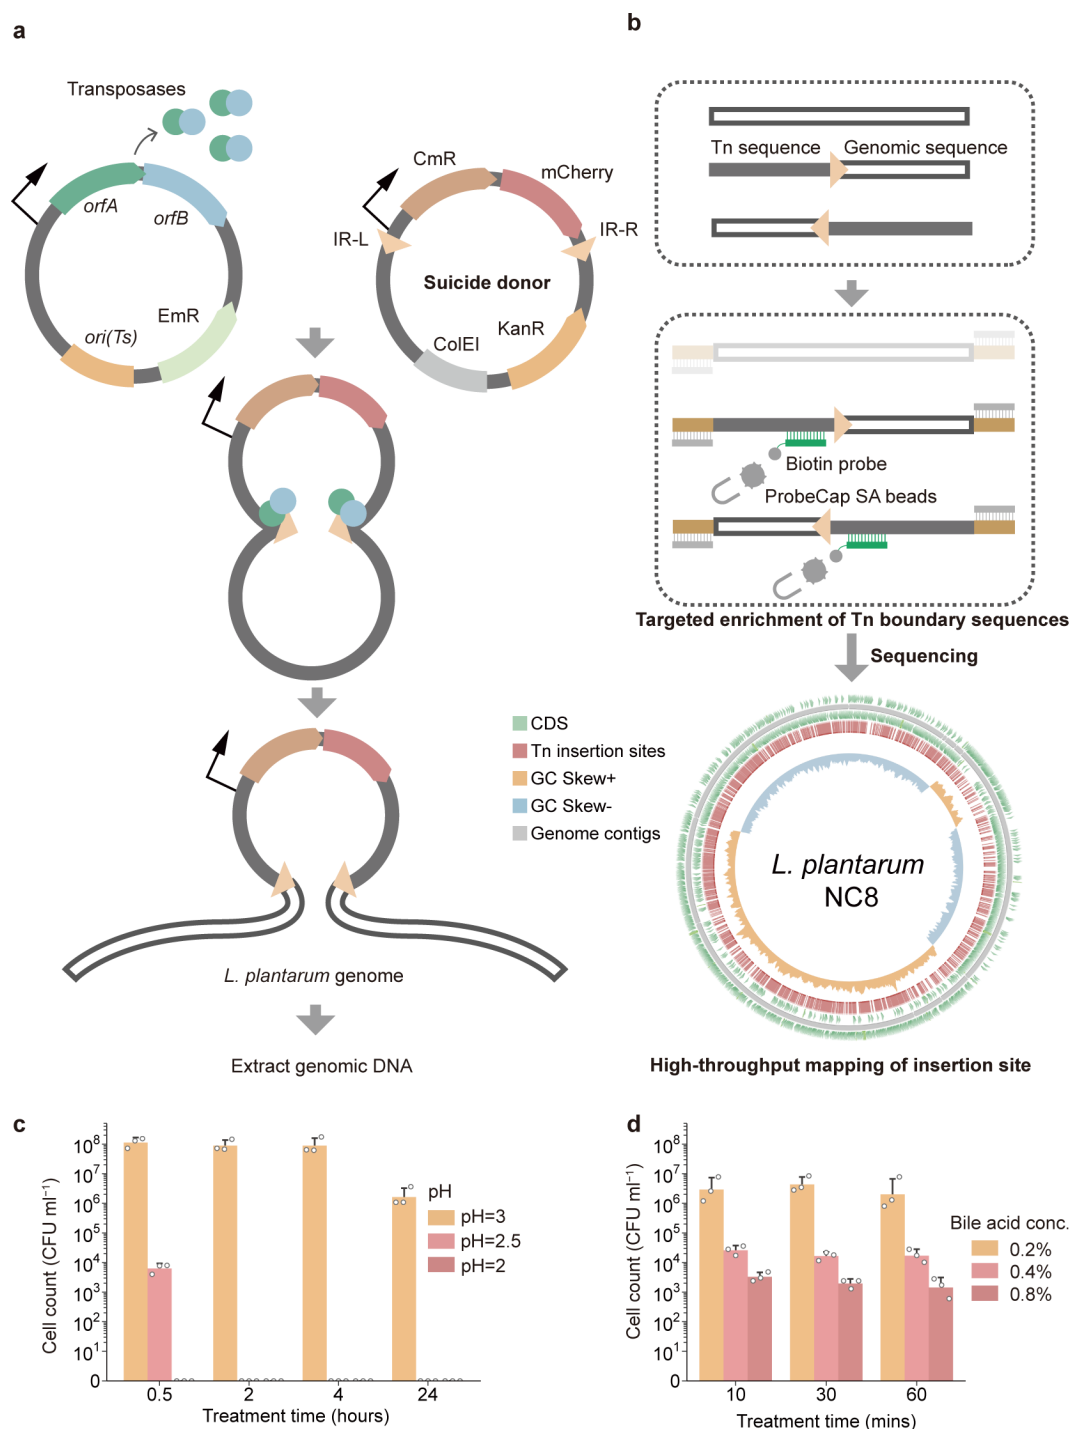

**Extended Data Fig. 8: Construction of *L. plantarum* Tn-mutagenesis system.**

(a) Schematic of the Tn-mutagenesis system in *L. plantarum*. A thermo-sensitive plasmid for constitutively expressing transposases is first introduced into *L. plantarum*, followed by electroporation of a suicide transposon donor that cannot replicate in *L. plantarum* (Methods). The integrated colonies that maintain CmR (chloramphenicol resistance) are selected. (b) Targeted enrichment sequencing for identifying the Tn-inserted genomic features. (c and d) Preliminary exploration of screening conditions for low pH treatment (c) and bile acid concentration (d) (mean  $\pm$  sd, n = 3 independent experiments).

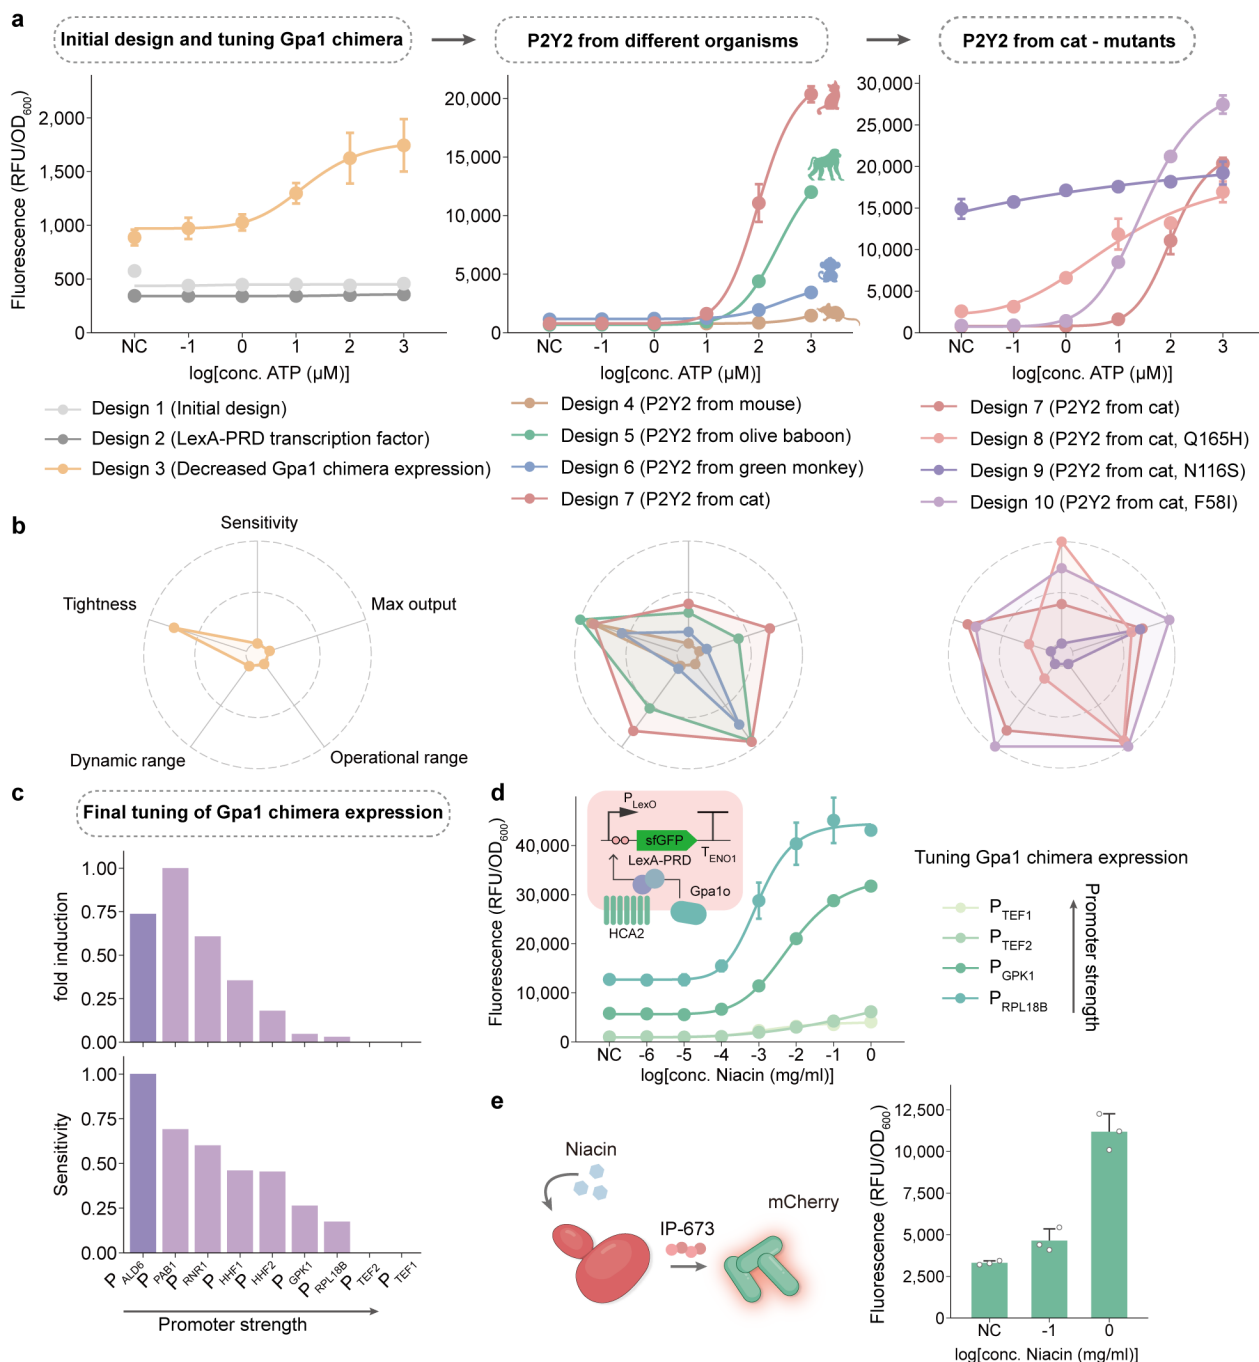

**Extended Data Fig. 9: Construction and optimization of yeast GPCR-based sensor.**

(a and b) Dose-response curve (a) and radar chart (b) of the yeast eATP sensor constructs (mean  $\pm$  sd,  $n = 2$  or 3 independent cultures). (c) Characterization of eATP sensor fold induction and sensitivity with various promoters for G $\alpha$  chimera expression (mean). (d) Dose-response curve of yeast GPCR-based niacin sensor designs (mean  $\pm$  sd,  $n = 3$  independent cultures). (e) Characterization of niacin sensing consortia with *L. plantarum* expressing mCherry as output (mean  $\pm$  sd,  $n = 3$  independent cultures). NC, negative control.

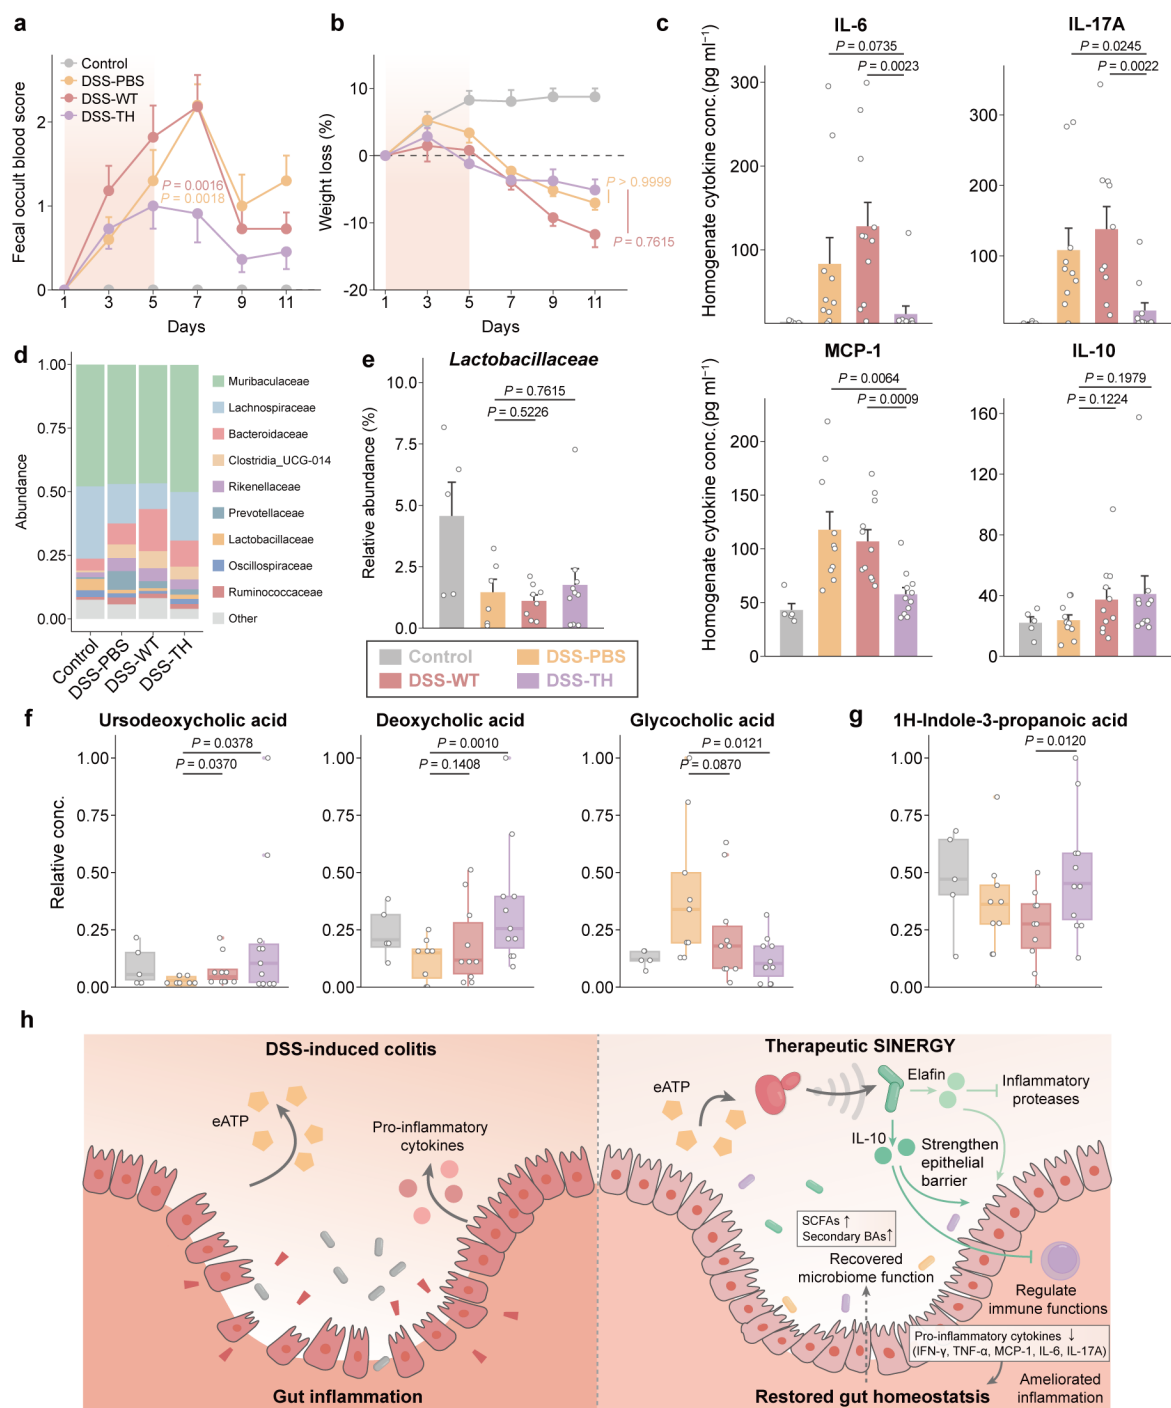

**Extended Data Fig. 10: Response of DSS-induced colitis to therapeutic SINERGY, consisting of engineered consortia, as revealed by restored microbiota and metabolite levels.**

(a and b) Fecal occult blood score (a) and body weight loss (b) of each group of mice (mean  $\pm$  SEM, statistical significance was determined by two-way ANOVA, P value representing comparison of DSS-TH group versus DSS-PBS or DSS-WT group, n = 5 mice for Control group, n = 10 for DSS-PBS group, n = 11 for DSS-WT and DSS-TH group). (c) Additional cytokine levels of colon homogenate (mean  $\pm$  SEM, statistical significance was determined by unpaired two-sided t-test, n = 5 samples for Control group, n = 10 for DSS-PBS group, n

= 11 for DSS-WT and DSS-TH group). **(d)** Relative abundance of bacteria classified at a family-level taxonomy. **(e)** Relative abundance of the *Lactobacillaceae* family (mean  $\pm$  SEM, statistical significance was determined by unpaired two-sided t-test, n = 5 samples for Control group, n = 7 for DSS-PBS group, n = 8 for DSS-WT and n = 10 DSS-TH group). **(f and g)** Additional bile acid metabolites **(f)** and indole-3-propanoic acid **(g)** of colon content (statistical significance was determined by unpaired two-sided t-test, n = 5 samples for Control group, n = 9 for DSS-PBS group, n = 10 for DSS-WT and n = 11 DSS-TH group). **(h)** Schematic of the multiple functions of therapeutic SINERGY in DSS-induced colitis.
